# Supplementary material for: Solvent-free aerobic selective oxidation of hydrocarbons catalyzed by porous graphitic carbon encapsulated cobalt composites
Source: Royal Society of Chemistry journal article supplement (doi:10.1039/c8nj03492c), 2018-01-01
Supplement: c8nj03492c1.pdf [file c8nj03492c1.pdf]

## Supporting Information

# Solvent-free Aerobic Selective Oxidation of Hydrocarbons Catalyzed by Porous Graphitic Carbon Encapsulate Cobalt Composites

Yuchen Jiang, Chenjun Zhang, Yue Li, Pingping Jiang, Jiusheng Jiang, Yan Leng\*

*The Key Laboratory of Synthetic and Biological Colloids, Ministry of Education, School of Chemical and Material Engineering, Jiangnan University, Wuxi, Jiangsu 214122, China. E-mail: [yanleng@jiangnan.edu.cn](mailto:yanleng@jiangnan.edu.cn)*

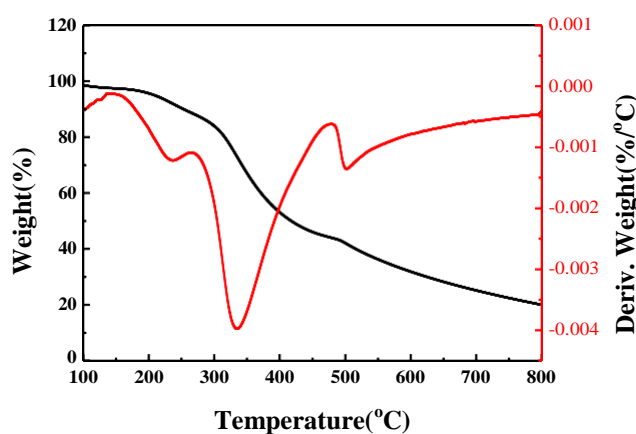

Figure S1. TGA curves of Co@C<sub>800</sub>.

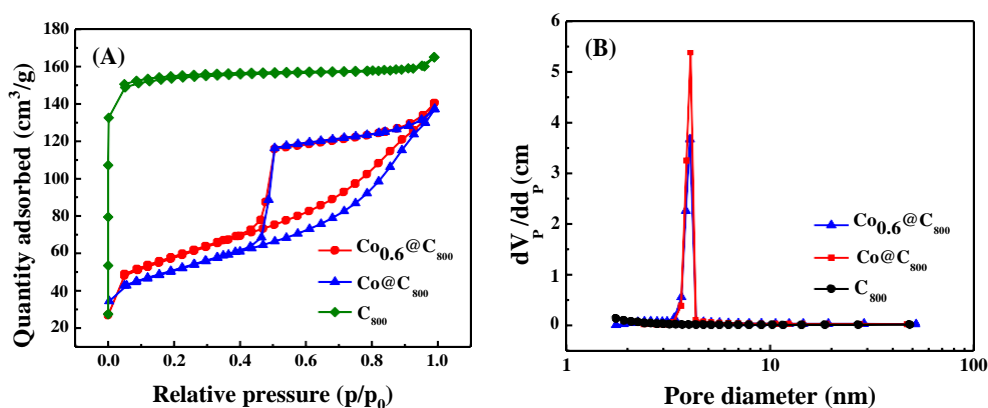

Figure S2. (A) Nitrogen adsorption-desorption isotherms of Co<sub>0.6</sub>@C<sub>800</sub>, Co@C<sub>800</sub> and C<sub>800</sub>. (B) Pore size distribution of a) Co<sub>0.6</sub>@C<sub>800</sub>, b) Co@C<sub>800</sub> and C<sub>800</sub>.

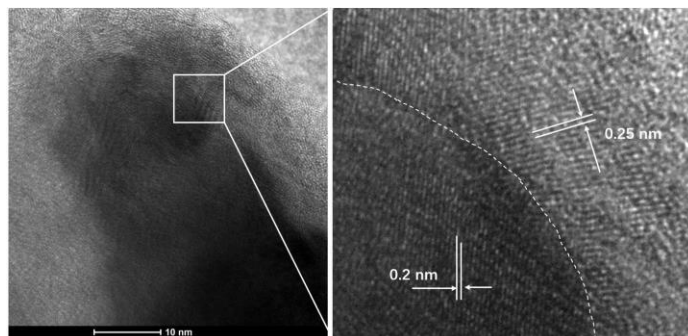

Figure S3. HTEM images of Co@C<sub>800</sub>.

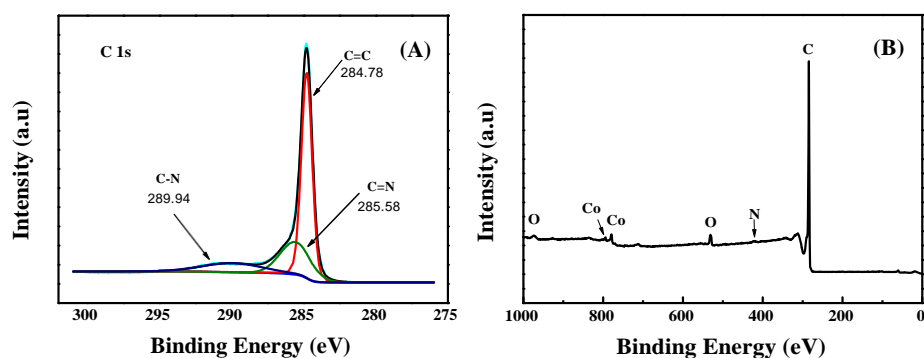

Figure S4. (A) C 1s spectra, and (B) XPS survey spectrum of Co@C<sub>800</sub>.

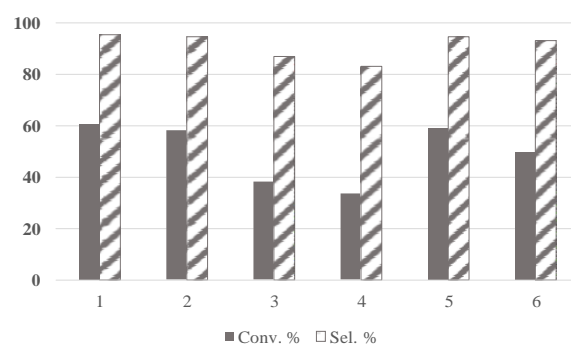

Figure S5. Catalyst recycling in oxidation of ethylbenzene with O<sub>2</sub> over Co@C<sub>800</sub>. At the fifth run, the recovered catalyst was retreated through calcination at 600 °C in Ar.

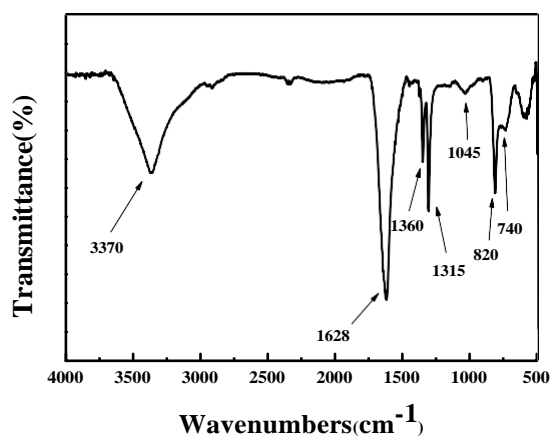

Figure S6. FTIR spectra of reused Co@C<sub>800</sub> after the first four reactions before calcination.

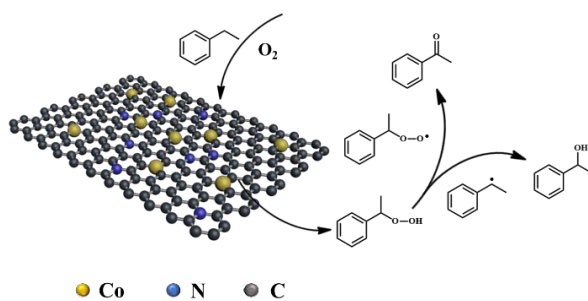

Scheme S1. Proposed mechanism for the ethylbenzene oxidation over the Co@C<sub>800</sub> using O<sub>2</sub> as an oxidant.

**Table S1.** The effect of the lazy glycine amount on the hybrid yield.

| Resorcinol (g) | Formaldehyde<br>(37 wt%) (g) | Cobalt acetate<br>(g) | Lazy glycine | Yield [%] |
|----------------|------------------------------|-----------------------|--------------|-----------|
| 3.0            | 4.42                         | 1.5                   | 0.5          | 22.0%     |
| 3.0            | 4.42                         | 1.5                   | 1.0          | 46.42%    |
| 3.0            | 4.42                         | 1.5                   | 1.5          | 45.21%    |

**Table S2.** The ratio analysis of the peaks in XPS spectra of the catalysts

| Catalysts           | Content <sup>a</sup> (at%) |       |       |       |
|---------------------|----------------------------|-------|-------|-------|
|                     | C                          | N     | O     | Co    |
| Co@C <sub>800</sub> | 94.743                     | 1.302 | 3.048 | 0.907 |

<sup>a</sup>The contents of various elements were measured by X-ray photoelectron spectroscopy.

**Table S3.** Catalytic performance of Co@C<sub>800</sub> and various reported catalytic system in literature for selective oxidation of ethylbenzene.

| Entry                                                        | Catalyst                                                                                  | T<br>(K) | n <sub>FA</sub> /n <sub>metal</sub> | TOF (h <sup>-1</sup> ) | Reference                                                  |
|--------------------------------------------------------------|-------------------------------------------------------------------------------------------|----------|-------------------------------------|------------------------|------------------------------------------------------------|
| <b>noble metal catalysts (entry 1-4)</b>                     |                                                                                           |          |                                     |                        |                                                            |
| 1                                                            | [(pymox-Me <sub>2</sub> )RuCl <sub>2</sub> ] <sup>+</sup><br>BF <sub>4</sub> <sup>-</sup> | 293      | 100                                 | 5 <sup>a</sup>         | Org. Lett., 2009, 11, 1567-1569. <sup>S1</sup>             |
| 2                                                            | Pd@C-Glu <sub>A</sub> -550                                                                | 393      | 200                                 | 245 <sup>a</sup>       | Nat. commun., 2013, 4, 1593. <sup>S2</sup>                 |
| 3                                                            | AuNPs@3D-(N)GFs                                                                           | 273      | 666                                 | 128 <sup>a</sup>       | Appl. Organomet. Chem., 2015, 29, 456-461. <sup>S3</sup>   |
| 4                                                            | nano Ag/ZnO (2)                                                                           | 413      | 5417                                | 130 <sup>a</sup>       | J. Mol. Catal. A: Chem., 2010, 331, 40-49. <sup>S4</sup>   |
| <b>Traditional small-scale test use Solvent (entry 5-10)</b> |                                                                                           |          |                                     |                        |                                                            |
| 5                                                            | Co/phen@C B-800-L                                                                         | 353      | 1000                                | 124 <sup>a</sup>       | Catal. Commun., 2017, 97, 130-133. <sup>S5</sup>           |
| 6                                                            | complex 1                                                                                 | 353      | 100                                 | 4.4 <sup>a</sup>       | Appl. Catal., A, 2017, 531, 45-51. <sup>S6</sup>           |
| 7                                                            | CuTSPc@3D-(N)GFs                                                                          | 273      | 250                                 | 20 <sup>a</sup>        | Chem. Commun., 2014, 50, 7855-7857. <sup>S7</sup>          |
| 8                                                            | Fe-N-C-700                                                                                | 273      | 175                                 | 33 <sup>a</sup>        | J. Am. Chem. Soc. 2017, 139, 10790-10798. <sup>S8</sup>    |
| 9                                                            | Co/AC-salen-400                                                                           | 353      | 132                                 | 13 <sup>a</sup>        | Phys. Chem. Chem. Phys. 2017, 19, 4967-4974. <sup>S9</sup> |
| 10                                                           | Mn-PPOP-1                                                                                 | 273      | 20                                  | 1.6 <sup>a</sup>       | Dalton Trans., 2017, 46, 11372-11379. <sup>S10</sup>       |
| 11                                                           | Mn-MOF-74                                                                                 | 408      | 1333                                | 33 <sup>a</sup>        | Dalton Trans., 2017, 46, 8415-8421. <sup>S11</sup>         |

| Solvent-free largescale test used O <sub>2</sub> as oxidant (entry 12-21) |                                                       |     |       |                   |                                                                   |
|---------------------------------------------------------------------------|-------------------------------------------------------|-----|-------|-------------------|-------------------------------------------------------------------|
| 12                                                                        | Mn(OH) <sub>x</sub> /γ-Al <sub>2</sub> O <sub>3</sub> | 408 | 1333  | 35 <sup>a</sup>   | Catal. Sci. Technol., 2016, 6, 442-448. <sup>S12</sup>            |
| 13                                                                        | CoNCB-2                                               | 393 | 20000 | 2064 <sup>b</sup> | ChemCatChem, 2016, 8, 1782-1787. <sup>S13</sup>                   |
| 14                                                                        | Co-N-C/CeO <sub>2</sub>                               | 393 | 2826  | 140 <sup>a</sup>  | Phys. Chem. Chem. Phys., 2015, 17, 14012-14020. <sup>S14</sup>    |
| 15                                                                        | Mn-MOF-74                                             | 408 | 1333  | 33 <sup>a</sup>   | Dalton Trans., 2017, 46, 8415-8421. <sup>S15</sup>                |
| 16                                                                        | Mn-N-C@SiO <sub>2</sub>                               | 393 | 12177 | 3229 <sup>b</sup> | Chem. Commun., 2016, 52, 5577-5580. <sup>S16</sup>                |
| 17                                                                        | FP-Co-SiO <sub>2</sub>                                | 393 | 7744  | 480 <sup>a</sup>  | Chem. Commun., 2011, 47, 1336-1338. <sup>S17</sup>                |
| 18                                                                        | Co-N-C-0.3/SiO <sub>2</sub>                           | 393 | 15543 | 1150 <sup>b</sup> | Phys. Chem. Chem. Phys., 2016, 18, 4635-4642. <sup>S18</sup>      |
| 19                                                                        | MnS-1                                                 | 383 | 2215  | 106 <sup>a</sup>  | Microporous Mesoporous Mater., 2011, 146, 166-171. <sup>S19</sup> |
| 20                                                                        | Co-N-C-800                                            | 393 | 1016  | 20 <sup>a</sup>   | J. Mol. Catal. A: Chem., 2015, 408, 91-97. <sup>S20</sup>         |
| 21                                                                        | Co@C <sub>800</sub>                                   | 393 | 38857 | 4514 <sup>b</sup> | This work                                                         |

$${}^a\text{TOF (h}^{-1}\text{)} = \frac{\text{the amount of ethylbenzene converted [mol]}}{\text{Total mol metal atoms [mol]} \cdot \text{time [h]}}$$

$${}^b\text{TOF (h}^{-1}\text{)} = \frac{\text{the amount of ethylbenzene converted [mol]}}{\text{metal atoms on the surface [mol]} \cdot \text{time [h]}}$$

### Supplementary References

- S1 C. S. Yi, K. H. Kwon and D. W. Lee, *Org. Lett.*, 2009, **11**, 1567-1569.
- S2 P. Zhang, Y. Gong, H. Li, Z. Chen and Y. Wang, *Nat. Commun.*, 2013, **4**, 1593.
- S3 M. Mahyari, M. S. Laeini, A. Shaabani and H. Kazerooni, *Appl. Organomet. Chem.*, 2015, **29**, 456-461.
- S4 M. J. Beier, B. Schimmoeller, T. W. Hansen, J. E. Andersen, S. E. Pratsinis and J. D. Grunwaldt, *J. Mol. Catal. A: Chem.*, 2010, **331**, 40-49.
- S5 D. H. Tu, Y. Li, J. Li, Y. J. Gu, B. Wang, Z. T. Liu and J. Lu, *Catal. Commun.*, 2017, **97**, 130-133.
- S6 S. B. Khomane, D. S. Doke, M. K. Dongare, S. B. Halligudi and S. B. Umbarkar, *Appl. Catal., A* 2017, **531**, 45-
- S7 M. Mahyari, M. S. Laeini and A. Shaabani, *Chem. Commun.* 2014, **50**, 7855-7857.

- S8 W. Liu, L. Zhang, X. Liu, X. Liu, X. Yang, S. Miao and T. Zhang, *J. Am. Chem. Soc.*, 2017, **139**, 10790-10798.
- S9 K. Nakatsuka, T. Yoshii, Y. Kuwahara, K. Mori and H. Yamashita, *Phys. Chem. Chem. Phys.*, 2017, **19**, 4967-4974.
- S10 Z. D. Ding, W. Zhu, T. Li, R. Shen, Y. Li, Z. Li and Z. G. Gu, *Dalton Trans.*, 2017, **46**, 11372-11379.
- S11 Y. Kuwahara, Y. Yoshimura and Yamashita, H. *Dalton Trans.*, 2017, **46**, 8415-8421.
- S12 Y. Kuwahara, Y. Yoshimura and Yamashita, H. *Catal. Sci. Technol.*, 2016, **6**, 442-448.
- S13 Y. Chen, L. Fu, Z. Liu and Y. Wang, *ChemCatChem*, 2016, **8**, 1782-1787.
- S14 Y. Chen, S. Zhao and Z. Liu, *Phys. Chem. Chem. Phys.*, 2015, **17**, 14012-14020.
- S15 Y. Kuwahara, Y. Yoshimura and H. Yamashita, *Dalton Trans.*, 2017, **46**, 8415-8421.
- S16 L. Fu, S. Zhao, Y. Chen and Z. Liu, *Chem. Commun.*, 2016, **52**, 5577-5580.
- S17 C. Chen, J. Xu, Q. Zhang, Y. Ma, L. Zhou and M. Wang, *Chem. Commun.*, 2011, **47**, 1336-1338.
- S18 C. Yang, L. Fu, R. Zhu and Z. Liu, *Phys. Chem. Chem. Phys.*, 2016, **18**, 4635-4642.
- S19 N. N. Tušar, S. C. Laha, S. Cecowski, I. Arčon, V. Kaučič and R. Gläser, *Microporous Mesoporous Mater.*, 2011, **146**, 166-171.
- S20 L. Fu, Y. Chen and Z. Liu, *J. Mol. Catal. A: Chem.*, 2015, **408**, 91-97.
